# Supplementary material
Source: PubMed Central journal article supplement (PMC3262027)
Supplement: NIHMS346991-supplement-1_si_001.pdf [file NIHMS346991-supplement-1_si_001.pdf]

# Supporting Information

## Design, Synthesis, and Biological Evaluation of Potent Quinoline and Pyrroloquinoline Ammosamide Analogues as Inhibitors of Quinone Reductase 2

P. V. Narasimha Reddy,<sup>†</sup> Katherine C. Jensen,<sup>§</sup> Andrew D. Mesecar,<sup>§</sup> Phillip E. Fanwick,<sup>‡</sup> and  
Mark Cushman<sup>\*†</sup>

<sup>†</sup>*Department of Medicinal Chemistry and Molecular Pharmacology, College of Pharmacy, and  
The Purdue University Center for Cancer Research, Purdue University, West Lafayette, Indiana  
47907, <sup>§</sup>Departments of Biological Sciences and Chemistry, and The Purdue University Center  
for Cancer Research, Purdue University, West Lafayette, Indiana 47907, <sup>‡</sup>Department of  
Chemistry, Purdue University, West Lafayette, Indiana 47907*

Abbreviations used: CIMS, chemical ionization mass spectrometry; DIPEA, *N,N*-diisopropylethylamine; DMF, *N,N*-dimethylformamide; DMSO, dimethyl sulfoxide, EIMS, electron impact mass spectrometry; ESIMS, electrospray ionization mass spectrometry; FAD, flavin adenine dinucleotide; HRMS, high resolution mass spectrometry; NCS, *N*-chlorosuccinimide; NMeH, *N*-methyldihydronicotinamide; PTSA, *p*-toluenesulfonic acid; QR2, quinone reductase 2; THF, tetrahydrofuran.

\*To whom correspondence should be addressed. Tel: 765-494-1465. Fax: 765-494-6790.

E-mail: cushman@purdue.edu.

## Table of Contents

|                                                                                                               |     |
|---------------------------------------------------------------------------------------------------------------|-----|
| <b>Figure S1. ORTEP and Coordinates for the Crystal Structure of Compound 34</b>                              | S3  |
| <b>Experimental Section for Crystallography of Compound 34</b>                                                | S4  |
| <b>Positional Parameters and Their Standard Uncertainties for <math>C_{13}H_7ClN_2O_5, CHCl_3</math> (34)</b> | S6  |
| <b>Table of Bond Distances in Angstroms for <math>C_{13}H_7ClN_2O_5, CHCl_3</math> (34)</b>                   | S7  |
| <b>Crystal Data and Date Collection Parameters for <math>C_{13}H_7ClN_2O_5, CHCl_3</math> (34)</b>            | S8  |
| <b>Table of Bond Angles in Degrees for <math>C_{13}H_7ClN_2O_5, CHCl_3</math> (34)</b>                        | S9  |
| <b>Crystallographic Data for <math>C_{13}H_7ClN_2O_5, CHCl_3</math> (34)</b>                                  | S10 |
| <b>Figure S2. Gene expression profile for quinone reductase 2</b>                                             | S11 |
| <b>Figure S3. Fo-Fc Electron density omit maps for ammosamide B and compound 38</b>                           | S12 |

ORTEP and Coordinates for the Crystal Structure of Compound 34

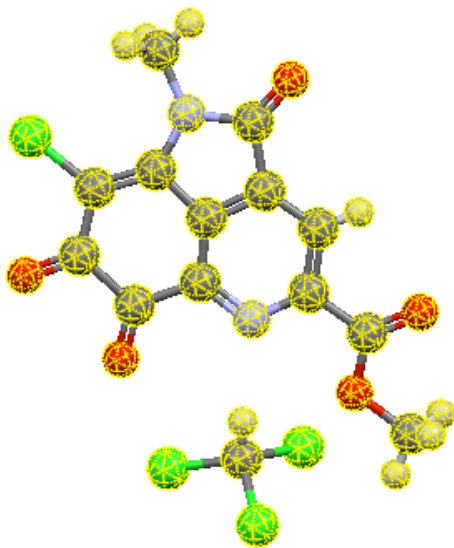

**Figure S1.** X-Ray Crystal structure (ORTEP) of compound **34** shown in ball and stick and colored according to atom type and X, Y and Z coordinates are shown in the below table.

## Experimental Section for Crystallography of Compound 34

### DATA COLLECTION

A orange plate of  $C_{13}H_7ClN_2O_5 \cdot CHCl_3$  having approximate dimensions of 0.18 x 0.16 x 0.05 mm was mounted on a fiber in a random orientation. Preliminary examination and data collection were performed Cu  $K_\alpha$  radiation ( $\lambda = 1.54184\text{\AA}$ ) on a Rigaku Rapid II equipped with confocal optics.

Cell constants for data collection were obtained from least-squares refinement, using the setting angles of 13857 reflections in the range  $3 < \theta < 70^\circ$ . The orthorhombic cell parameters and calculated volume are:  $a = 11.1237(4)$ ,  $b = 12.7728(5)$ ,  $c = 23.2174(7)\text{\AA}$ ,  $V = 3298.7(2)\text{\AA}^3$ . For  $Z = 8$  and F.W. = 426.04 the calculated density is 1.72  $\text{g}/\text{cm}^3$ . The refined mosaicity from DENZO/SCALEPACK was (ref 1) was  $0.48^\circ$  indicating good crystal quality. The space group was determined by the program XPREP(ref 2). From the systematic presences of:

$$\begin{array}{ll}hk0 & h=2n \\h0l & l=2n \\0kl & k=2n\end{array}$$

and from subsequent least-squares refinement, the space group was determined to be  $Pbc a(\# 61)$ .

The data were collected at a temperature of 150(1)K. Data were collected to a maximum  $2\theta$  of  $140.5^\circ$ .

### DATA REDUCTION

A total of 13857 reflections were collected, of which 2950 were unique. Frames were integrated with DENZO-SMN (ref 1).

Lorentz and polarization corrections were applied to the data. The linear absorption coefficient is 69.6 /mm for Cu  $K_\alpha$  radiation. An empirical absorption correction using SCALEPACK (ref 1) was applied. Transmission coefficients ranged from 0.681 to 0.706. Intensities of equivalent reflections were averaged. The agreement factor for the averaging was 3.4% based on intensity.

### STRUCTURE SOLUTION AND REFINEMENT

The structure was solved by direct methods using SIR2004 (ref 3). The remaining atoms were located in succeeding difference Fourier syntheses. Hydrogen atoms were located and their positions and anisotropic thermal parameters were refined. The structure was refined in full-matrix least-squares where the function minimized was  $\sum w(|F_o|^2 - |F_c|^2)^2$  and the weight  $w$  is defined as  $1/[\sigma^2(F_o^2) + (0.0518P)^2 + 4.1407P]$  where  $P = (F_o^2 + 2F_c^2)/3$ . Scattering factors were taken from the "International Tables for Crystallography" (ref 4). 2950 reflections were used in the refinements. However, only the 2722 reflections with  $F_o^2 > 2\sigma(F_o^2)$  were used in, calculating R1. The final cycle of refinement included 258 variable parameters and converged (largest parameter shift was  $< 0.01$  times its su) with unweighted and weighted agreement factors of:

$$\begin{aligned}R1 &= \sum |F_o - F_c| / \sum F_o = 0.041 \\R2 &= \text{SQRT} ( \sum w ( F_o^2 - F_c^2 )^2 / \sum w ( F_o^2 ) ) = 0.112\end{aligned}$$

The goodness-of-fit parameter was 1.15. The highest peak in the final difference Fourier had a height of  $0.35 \text{ e}/\text{\AA}^3$ . The minimum negative peak had a height of  $-0.32 \text{ e}/\text{\AA}^3$ .

Refinement was performed on a LINUX PC using SHELX-97 (ref 2). Crystallographic drawings were done using programs ORTEP (ref 5), and PLUTON (ref 6).

- 
- (1) Z. Otwinowski and W. Minor, Methods Enzymol., **276**, 307 (1997).
  - (2) G.M. Sheldrick Acta Cryst., **A64**, 112,(2008).
  - (3) M. C. Burla, R. Caliendo, M. Camalli, B. Carrozzini, G. L. Cascarano, L. De Caro, C. Giacovazzo, G. Polidori, and R. Spagna. , J. Appl. Cryst., **38**, 381 (2005)
  - (4) "International Tables for Crystallography", Vol. C, Kluwer Academic Publishers, Utrecht, The Netherlands, (1992), Tables 4.2.6.8 and 6.1.1.4
  - (5) C. K. Johnson, ORTEPII, Report ORNL-5138, Oak Ridge National Laboratory, Tennessee, USA (1976)

(6) A. L. Spek, PLUTON. Molecular Graphics Program. Univ. of Utrecht, The Netherlands (1991)

Positional Parameters and Their Standard Uncertainties for C<sub>13</sub>H<sub>7</sub>ClN<sub>2</sub>O<sub>5</sub>,CHCl<sub>3</sub> (34)

| Atom | $\bar{x}$    | $\bar{y}$   | $\bar{z}$   | $U(\text{\AA}^2)$ |
|------|--------------|-------------|-------------|-------------------|
| C14  | 0.05299(7)   | 0.15363(5)  | 0.61308(3)  | 0.0399(2)         |
| C191 | 0.00168(7)   | 0.38674(7)  | 0.28700(3)  | 0.0463(2)         |
| C192 | -0.03446(8)  | 0.61061(7)  | 0.29078(3)  | 0.0510(2)         |
| C193 | -0.23829(7)  | 0.47118(6)  | 0.27912(3)  | 0.0437(2)         |
| O1   | -0.37605(19) | 0.37852(19) | 0.64885(9)  | 0.0454(6)         |
| O5   | 0.16288(17)  | 0.24847(15) | 0.51071(8)  | 0.0342(5)         |
| O6   | 0.06192(16)  | 0.37465(14) | 0.42993(8)  | 0.0312(5)         |
| O91  | -0.42092(18) | 0.64327(15) | 0.45501(8)  | 0.0362(5)         |
| O92  | -0.27131(17) | 0.62281(14) | 0.39092(8)  | 0.0316(5)         |
| N2   | -0.1993(2)   | 0.29284(18) | 0.62421(9)  | 0.0324(6)         |
| N8   | -0.16165(19) | 0.48092(15) | 0.45651(9)  | 0.0246(5)         |
| C1   | -0.2923(3)   | 0.3670(2)   | 0.61639(11) | 0.0335(7)         |
| C3   | -0.1142(2)   | 0.29866(19) | 0.58121(11) | 0.0276(6)         |
| C4   | -0.0086(2)   | 0.2501(2)   | 0.57026(11) | 0.0293(7)         |
| C5   | 0.0616(2)    | 0.28046(19) | 0.51956(11) | 0.0286(7)         |
| C6   | 0.0076(2)    | 0.35837(19) | 0.47388(11) | 0.0255(6)         |
| C7   | -0.1073(2)   | 0.40964(19) | 0.48994(10) | 0.0242(6)         |
| C9   | -0.2651(2)   | 0.52209(19) | 0.47621(11) | 0.0263(6)         |
| C10  | -0.3197(2)   | 0.4958(2)   | 0.52882(11) | 0.0279(6)         |
| C11  | -0.2629(2)   | 0.4222(2)   | 0.56181(10) | 0.0275(6)         |
| C12  | -0.1571(2)   | 0.38006(19) | 0.54213(10) | 0.0256(6)         |
| C21  | -0.2053(4)   | 0.2171(3)   | 0.67114(15) | 0.0469(10)        |
| C91  | -0.3278(2)   | 0.6024(2)   | 0.44003(11) | 0.0281(6)         |
| C93  | -0.3294(3)   | 0.7019(3)   | 0.35544(14) | 0.0396(8)         |
| C911 | -0.0948(3)   | 0.4880(2)   | 0.30990(12) | 0.0357(8)         |
| H10  | -0.392(3)    | 0.526(2)    | 0.5394(13)  | 0.032(8)*         |
| H21A | -0.136(4)    | 0.218(3)    | 0.6951(19)  | 0.071(13)*        |
| H21B | -0.262(4)    | 0.243(3)    | 0.6972(19)  | 0.064(12)*        |
| H21C | -0.220(4)    | 0.154(4)    | 0.6583(19)  | 0.073(14)*        |
| H911 | -0.108(3)    | 0.487(2)    | 0.3501(14)  | 0.034(8)*         |
| H93A | -0.332(3)    | 0.767(3)    | 0.3764(14)  | 0.046(9)*         |
| H93B | -0.415(4)    | 0.676(3)    | 0.3464(18)  | 0.075(13)*        |
| H93C | -0.282(3)    | 0.708(2)    | 0.3215(15)  | 0.042(9)*         |

Starred atoms were refined isotropically

$$U_{\text{eq}} = (1/3)\sum_i \sum_j U_{ij} \mathbf{a}_i \cdot \mathbf{a}_j$$

**Table of Bond Distances in Angstroms for C<sub>13</sub>H<sub>7</sub>ClN<sub>2</sub>O<sub>5</sub>,CHCl<sub>3</sub> (34)**

| <u>Atom 1</u> | <u>Atom 2</u> | <u>Distance</u> | <u>Atom 1</u> | <u>Atom 2</u> | <u>Distance</u> |
|---------------|---------------|-----------------|---------------|---------------|-----------------|
| C14           | C4            | 1.726(3)        | C3            | C12           | 1.460(3)        |
| Cl91          | C911          | 1.763(3)        | C4            | C5            | 1.466(4)        |
| Cl92          | C911          | 1.761(3)        | C5            | C6            | 1.573(4)        |
| Cl93          | C911          | 1.761(3)        | C6            | C7            | 1.482(3)        |
| O1            | C1            | 1.207(3)        | C7            | C12           | 1.384(3)        |
| O5            | C5            | 1.215(3)        | C9            | C10           | 1.401(4)        |
| O6            | C6            | 1.205(3)        | C9            | C91           | 1.498(3)        |
| O91           | C91           | 1.211(3)        | C10           | C11           | 1.367(4)        |
| O92           | C91           | 1.328(3)        | C10           | H10           | 0.91(3)         |
| O92           | C93           | 1.457(3)        | C11           | C12           | 1.373(4)        |
| N2            | C3            | 1.378(3)        | C21           | H21A          | 0.94(4)         |
| N2            | C1            | 1.412(4)        | C21           | H21B          | 0.95(4)         |
| N2            | C21           | 1.460(4)        | C21           | H21C          | 0.88(4)         |
| N8            | C7            | 1.342(3)        | C93           | H93A          | 0.97(3)         |
| N8            | C9            | 1.347(3)        | C93           | H93B          | 1.01(4)         |
| C1            | C11           | 1.487(4)        | C93           | H93C          | 0.96(3)         |
| C3            | C4            | 1.351(4)        | C911          | H911          | 0.94(3)         |

-----  
Numbers in parentheses are standard uncertainties in the least significant digits.

**Crystal Data and Data Collection Parameters for C<sub>13</sub>H<sub>7</sub>ClN<sub>2</sub>O<sub>5</sub>·CHCl<sub>3</sub> (34)**

|                                               |                                                                              |
|-----------------------------------------------|------------------------------------------------------------------------------|
| formula                                       | C <sub>14</sub> H <sub>8</sub> Cl <sub>4</sub> N <sub>2</sub> O <sub>5</sub> |
| formula weight                                | 426.04                                                                       |
| space group                                   | P b c a (No. 61)                                                             |
| a, Å                                          | 11.1237(4)                                                                   |
| b, Å                                          | 12.7728(5)                                                                   |
| c, Å                                          | 23.2174(7)                                                                   |
| V, Å <sup>3</sup>                             | 3298.7(2)                                                                    |
| Z                                             | 8                                                                            |
| d <sub>calc</sub> , g cm <sup>-3</sup>        | 1.716                                                                        |
| crystal dimensions, mm                        | 0.18x0.16x0.05                                                               |
| temperature, K                                | 150.                                                                         |
| radiation (wavelength, Å )                    | Cu K <sub>α</sub> (1.54184)                                                  |
| monochromator                                 | graphite                                                                     |
| linear abs coef, mm <sup>-1</sup>             | 6.959                                                                        |
| absorption correction applied                 | empirical <sup>a</sup>                                                       |
| transmission factors: min, max                | 0.68, 0.71                                                                   |
| diffractometer                                | Nonius KappaCCD                                                              |
| h, k, l range                                 | 0 to 13 0 to 15 0 to 27                                                      |
| 2θ range, deg                                 | 6.92-140.47                                                                  |
| mosaicity, deg                                | 0.48                                                                         |
| programs used                                 | SHELXTL                                                                      |
| F <sub>000</sub>                              | 1712.0                                                                       |
| weighting                                     |                                                                              |
|                                               | $1/[\sigma^2(F_o^2)+(0.0518P)^2+4.1407P]$ where $P=(F_o^2+2F_c^2)/3$         |
| data collected                                | 13857                                                                        |
| unique data                                   | 2950                                                                         |
| R <sub>int</sub>                              | 0.034                                                                        |
| data used in refinement                       | 2950                                                                         |
| cutoff used in R-factor calculations          | $F_o^2 > 2.0\sigma(F_o^2)$                                                   |
| data with $I > 2.0\sigma(I)$                  | 2722                                                                         |
| number of variables                           | 258                                                                          |
| largest shift/esd in final cycle              | 0.00                                                                         |
| R(F <sub>o</sub> )                            | 0.041                                                                        |
| R <sub>w</sub> (F <sub>o</sub> <sup>2</sup> ) | 0.112                                                                        |
| goodness of fit                               | 1.146                                                                        |

---

<sup>a</sup> Otwinowski Z. & Minor, W. Methods Enzymol. **1996**,276307.



**Table of Bond Angles in Degrees for C<sub>13</sub>H<sub>7</sub>ClN<sub>2</sub>O<sub>5</sub>·CHCl<sub>3</sub> (34)**

| <u>Atom 1</u> | <u>Atom 2</u> | <u>Atom 3</u> | <u>Angle</u> | <u>Atom 1</u> | <u>Atom 2</u> | <u>Atom 3</u> | <u>Angle</u> |
|---------------|---------------|---------------|--------------|---------------|---------------|---------------|--------------|
| C91           | O92           | C93           | 114.3(2)     | C9            | C10           | H10           | 120.9(19)    |
| C3            | N2            | C1            | 111.9(2)     | C10           | C11           | C12           | 118.5(2)     |
| C3            | N2            | C21           | 127.5(3)     | C10           | C11           | C1            | 134.7(2)     |
| C1            | N2            | C21           | 120.4(2)     | C12           | C11           | C1            | 106.7(2)     |
| C7            | N8            | C9            | 117.0(2)     | C11           | C12           | C7            | 121.9(2)     |
| O1            | C1            | N2            | 124.5(2)     | C11           | C12           | C3            | 110.6(2)     |
| O1            | C1            | C11           | 130.0(3)     | C7            | C12           | C3            | 127.4(2)     |
| N2            | C1            | C11           | 105.4(2)     | N2            | C21           | H21A          | 112(2)       |
| C4            | C3            | N2            | 135.1(2)     | N2            | C21           | H21B          | 105(3)       |
| C4            | C3            | C12           | 119.5(2)     | H21A          | C21           | H21B          | 102(3)       |
| N2            | C3            | C12           | 105.3(2)     | N2            | C21           | H21C          | 111(3)       |
| C3            | C4            | C5            | 119.6(2)     | H21A          | C21           | H21C          | 113(4)       |
| C3            | C4            | C14           | 124.4(2)     | H21B          | C21           | H21C          | 113(4)       |
| C5            | C4            | C14           | 116.0(2)     | O91           | C91           | O92           | 124.5(2)     |
| O5            | C5            | C4            | 122.8(2)     | O91           | C91           | C9            | 122.1(2)     |
| O5            | C5            | C6            | 117.0(2)     | O92           | C91           | C9            | 113.4(2)     |
| C4            | C5            | C6            | 120.2(2)     | O92           | C93           | H93A          | 108.3(18)    |
| O6            | C6            | C7            | 124.7(2)     | O92           | C93           | H93B          | 108(2)       |
| O6            | C6            | C5            | 119.1(2)     | H93A          | C93           | H93B          | 112(3)       |
| C7            | C6            | C5            | 116.1(2)     | O92           | C93           | H93C          | 104.9(19)    |
| N8            | C7            | C12           | 120.7(2)     | H93A          | C93           | H93C          | 111(3)       |
| N8            | C7            | C6            | 122.9(2)     | H93B          | C93           | H93C          | 113(3)       |
| C12           | C7            | C6            | 116.4(2)     | C192          | C911          | C193          | 110.55(17)   |
| N8            | C9            | C10           | 124.8(2)     | C192          | C911          | C191          | 110.08(15)   |
| N8            | C9            | C91           | 118.2(2)     | C193          | C911          | C191          | 109.85(15)   |
| C10           | C9            | C91           | 116.9(2)     | C192          | C911          | H911          | 108.6(16)    |
| C11           | C10           | C9            | 117.1(2)     | C193          | C911          | H911          | 104.9(17)    |
| C11           | C10           | H10           | 122.0(19)    | C191          | C911          | H911          | 112.8(17)    |

Numbers in parentheses are standard uncertainties in the least significant digits.

**Crystallographic Data for C<sub>13</sub>H<sub>7</sub>ClN<sub>2</sub>O<sub>5</sub>·CHCl<sub>3</sub> (34)**

C<sub>14</sub>H<sub>8</sub>Cl<sub>4</sub>N<sub>2</sub>O<sub>5</sub>  
a = 11.1237(4) Å  
b = 12.7728(5) Å  
c = 23.2174(7) Å  
V = 3298.7(2) Å<sup>3</sup>

formula weight = 426.04  
space group Pbc<sub>a</sub> (No. 61)  
T = 150. K  
λ = 1.54184 Å  
ρ<sub>calc</sub> = 1.716 g cm<sup>-3</sup>  
μ = 6.959 mm<sup>-1</sup>  
transmission coeff = 0.681-0.706  
R(F<sub>o</sub>)<sup>a</sup> = 0.041  
R<sub>w</sub>(F<sub>o</sub><sup>2</sup>)<sup>b</sup> = 0.112

---

<sup>a</sup>  $R = \frac{\sum ||F_o| - |F_c||}{\sum |F_o|}$  for  $F_o^2 > 2\sigma(F_o^2)$   
<sup>b</sup>  $R_w = \frac{[\sum w (|F_o^2| - |F_c^2|)^2]}{\sum w |F_o^2|^{1/2}}$

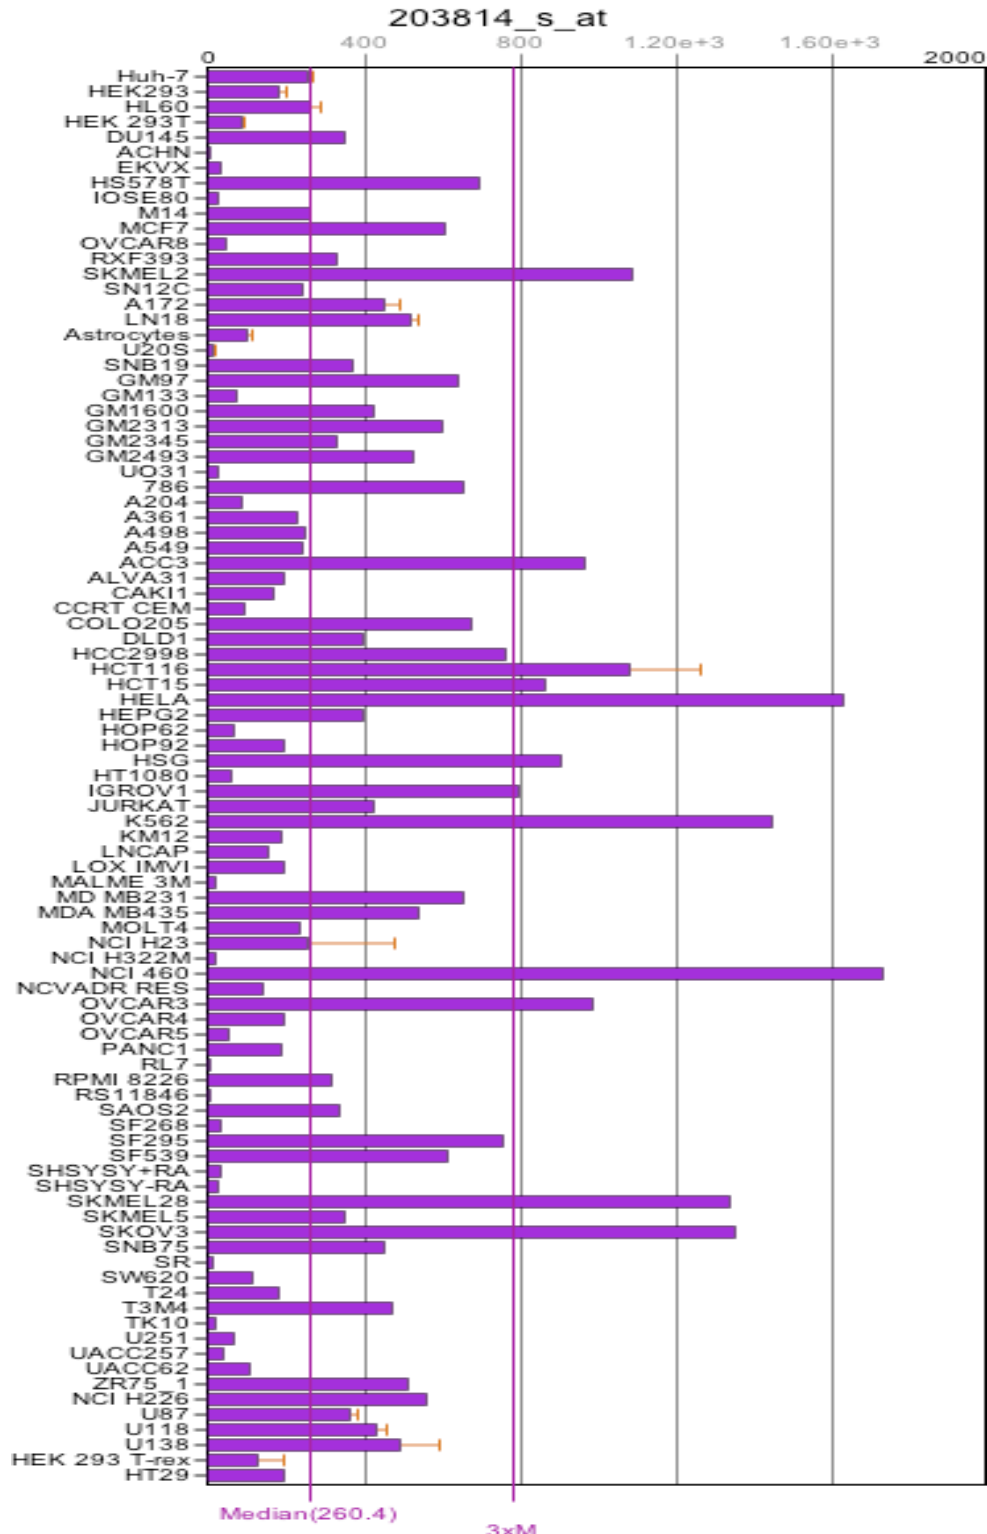

**Figure S2.** Gene expression profile for quinone reductase 2 (NQO2 or QR2) in the NCI-60 cell lines. Data are from the BioGPS database at website <http://biogps.org/#goto=genereport&id=4835>. The majority of cell lines exhibit expression of the QR2 gene.

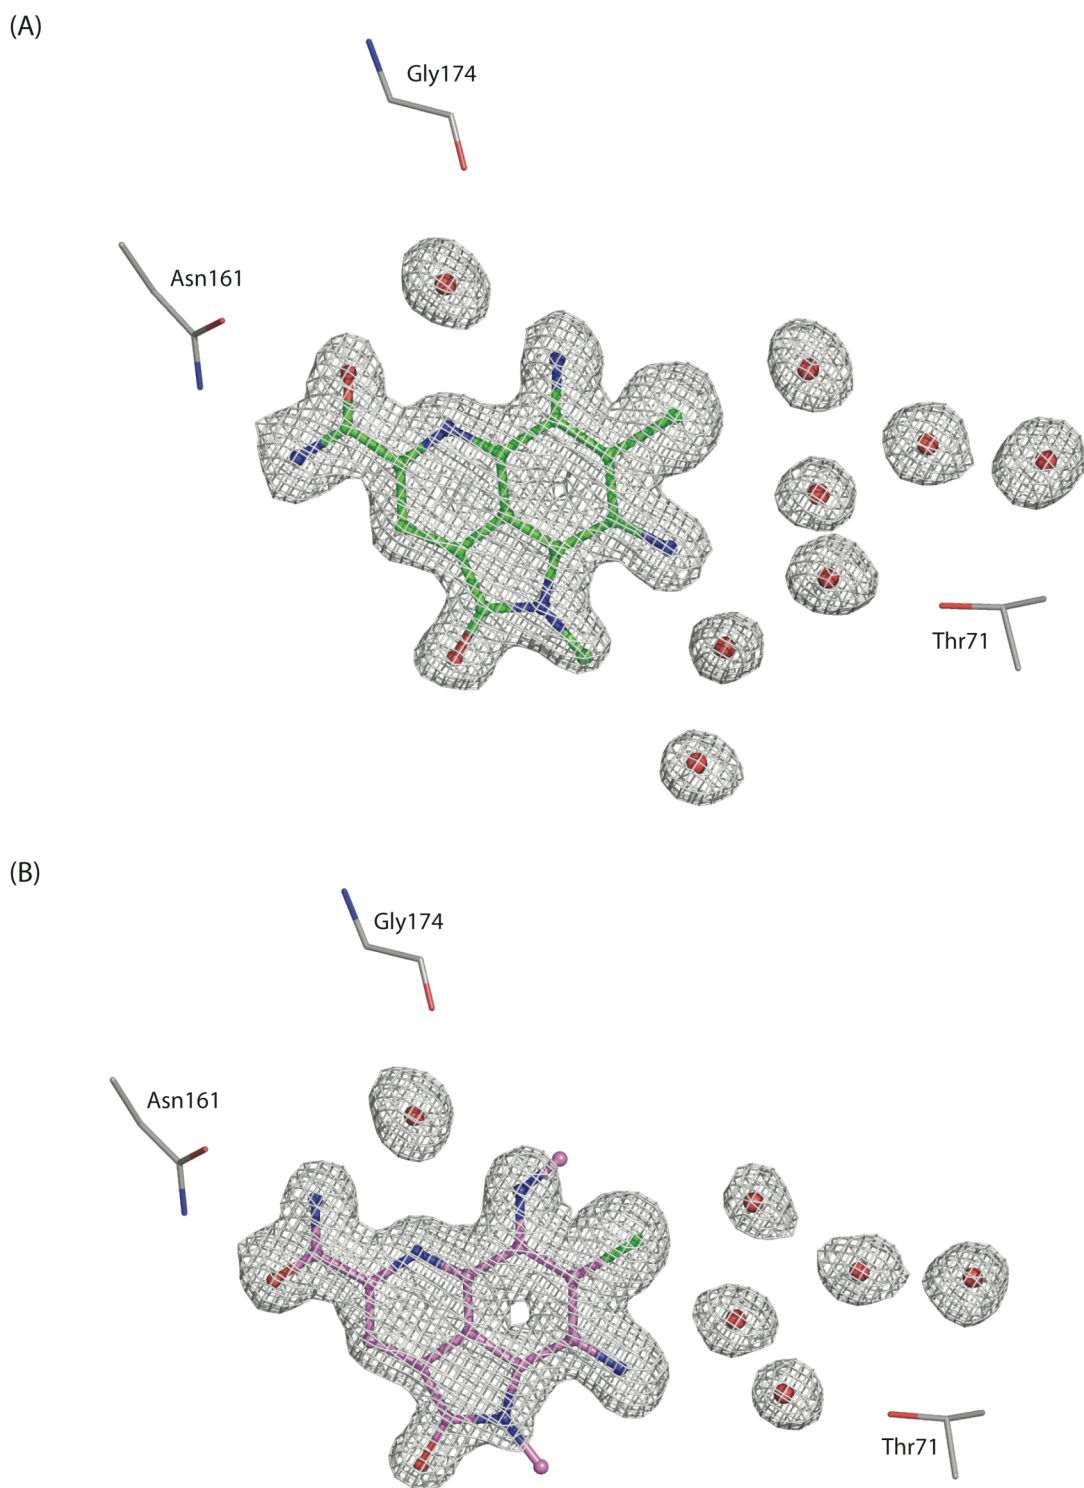

**Supplemental Figure S3.** Fo-Fc Electron density omit maps contoured at  $3\sigma$ . Electron density is shown in grey. Water molecules (red spheres) and ammosamide B (A) and compound **38** (B) were omitted from the map calculations.
